# Supplementary material
Source: PubMed Central journal article supplement (PMC10122364)
Supplement: 40560_2023_663_MOESM1_ESM.pdf [file 40560_2023_663_MOESM1_ESM.pdf]

## Additional File 1

### **Association between the timing of ICU admission and mortality in patients with hospital-onset sepsis: a nationwide prospective cohort study**

#### **Authors:**

Yoon Hae Ahn, MD<sup>1</sup>, Jinwoo Lee, MD, PhD<sup>2</sup>, Dong Kyu Oh, MD, PhD<sup>3</sup>, Su Yeon Lee, MD<sup>3</sup>, Mi Hyeon Park<sup>3</sup>, Haein Lee<sup>3</sup>, Chae-Man Lim, MD, PhD<sup>3</sup>, Sang-Min Lee, MD, PhD<sup>1,2</sup>, Hong Yeul Lee, MD, PhD<sup>1</sup>, on behalf of the Korean Sepsis Alliance (KSA) Investigators

#### **Affiliations:**

<sup>1</sup> Department of Critical Care Medicine, Seoul National University Hospital, Seoul, Korea

<sup>2</sup> Division of Pulmonary and Critical Care Medicine, Department of Internal Medicine, Seoul National University Hospital, Seoul, Korea

<sup>3</sup> Department of Pulmonary and Critical Care Medicine, Asan Medical Center, Seoul, Korea

#### **Corresponding author:**

Hong Yeul Lee, M.D.

Assistant Professor

Department of Critical Care Medicine, Seoul National University Hospital, 101 Daehak-ro, Jongno-gu, Seoul, 03080, Korea.

Tel: 82-2-2072-1457; Fax: 82-2-762-9662

E-mail: [takumama@naver.com](mailto:takumama@naver.com)

Table of Contents

|                |    |
|----------------|----|
| Figure S1..... | 3  |
| Figure S2..... | 4  |
| Figure S3..... | 5  |
| Figure S4..... | 6  |
| Figure S5..... | 7  |
| Table S1.....  | 8  |
| Table S2.....  | 12 |
| Table S3.....  | 13 |
| Table S4.....  | 14 |
| Table S5.....  | 15 |
| Table S6.....  | 16 |

**Figure S1. Distribution of the Propensity Score Before (left) and After (right) Matching**

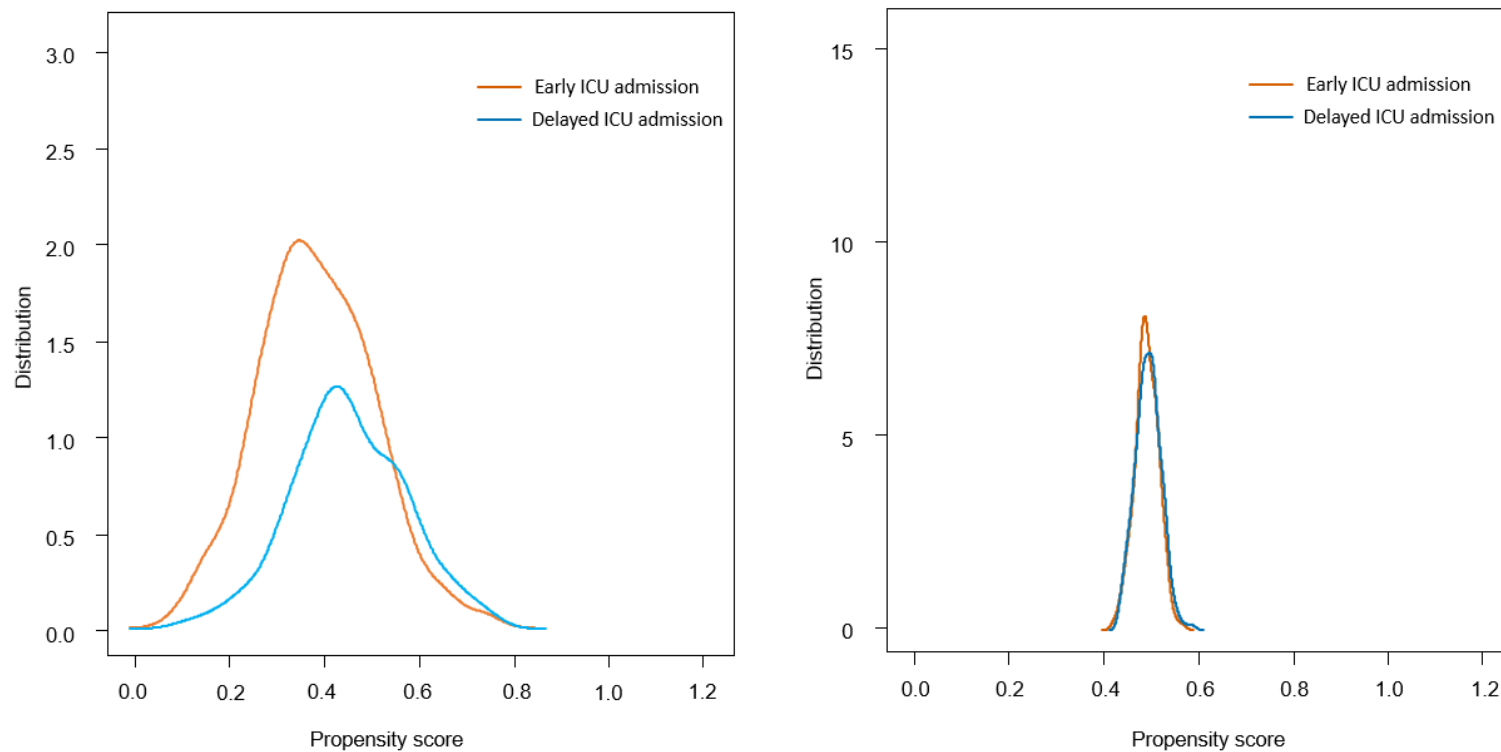

**Figure S2. Time to ICU admission and In-hospital Mortality**

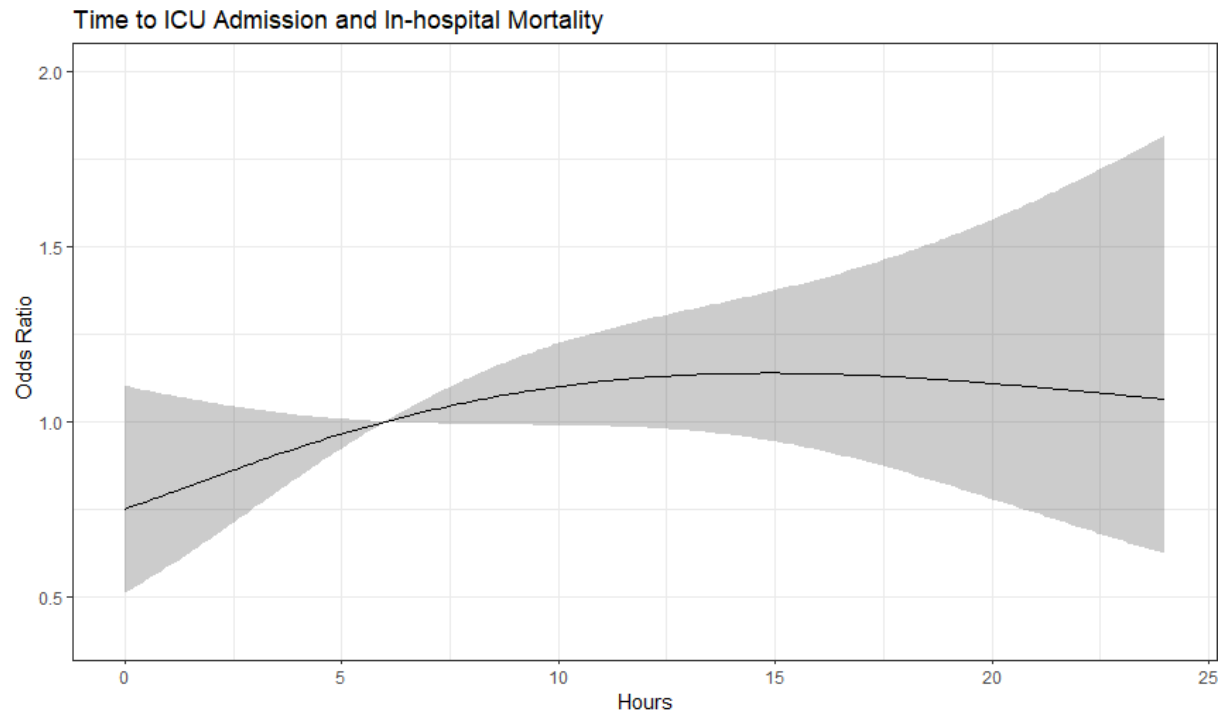

**Figure S2. Restricted cubic spline plot of the association between the time to ICU admission and in-hospital mortality**  
The plot was adjusted for age and initial sequential organ failure assessment (SOFA) scores. The shaded areas represent the 95% confidence intervals (CI).

**Figure S3. Rapid Response System by Operating Hours**

**Rapid Response System by Operating Hours**

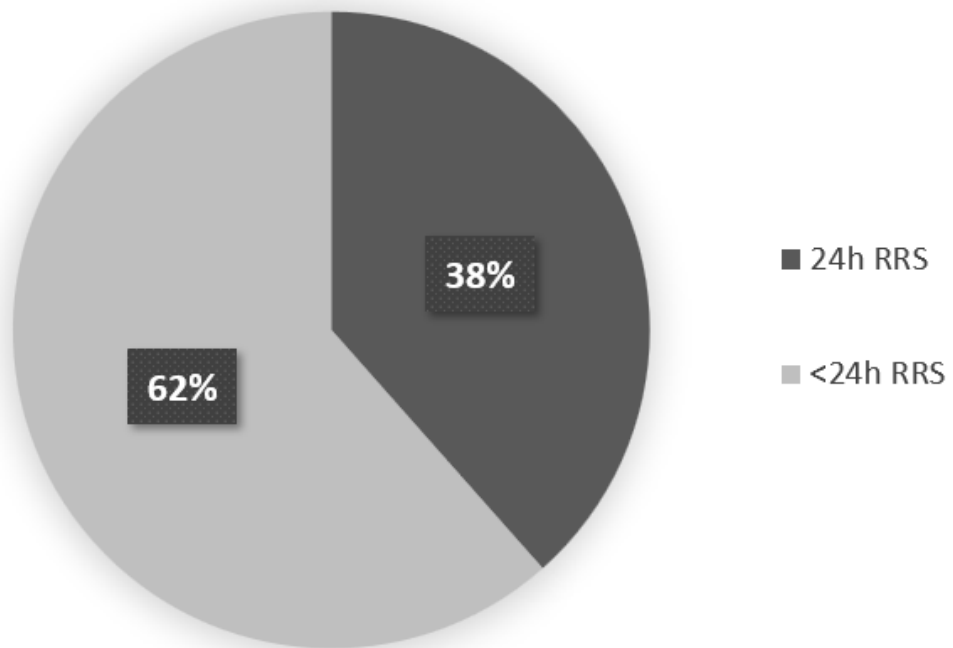

**Figure S4. Initial Antibiotic Therapy at Each Hospital**

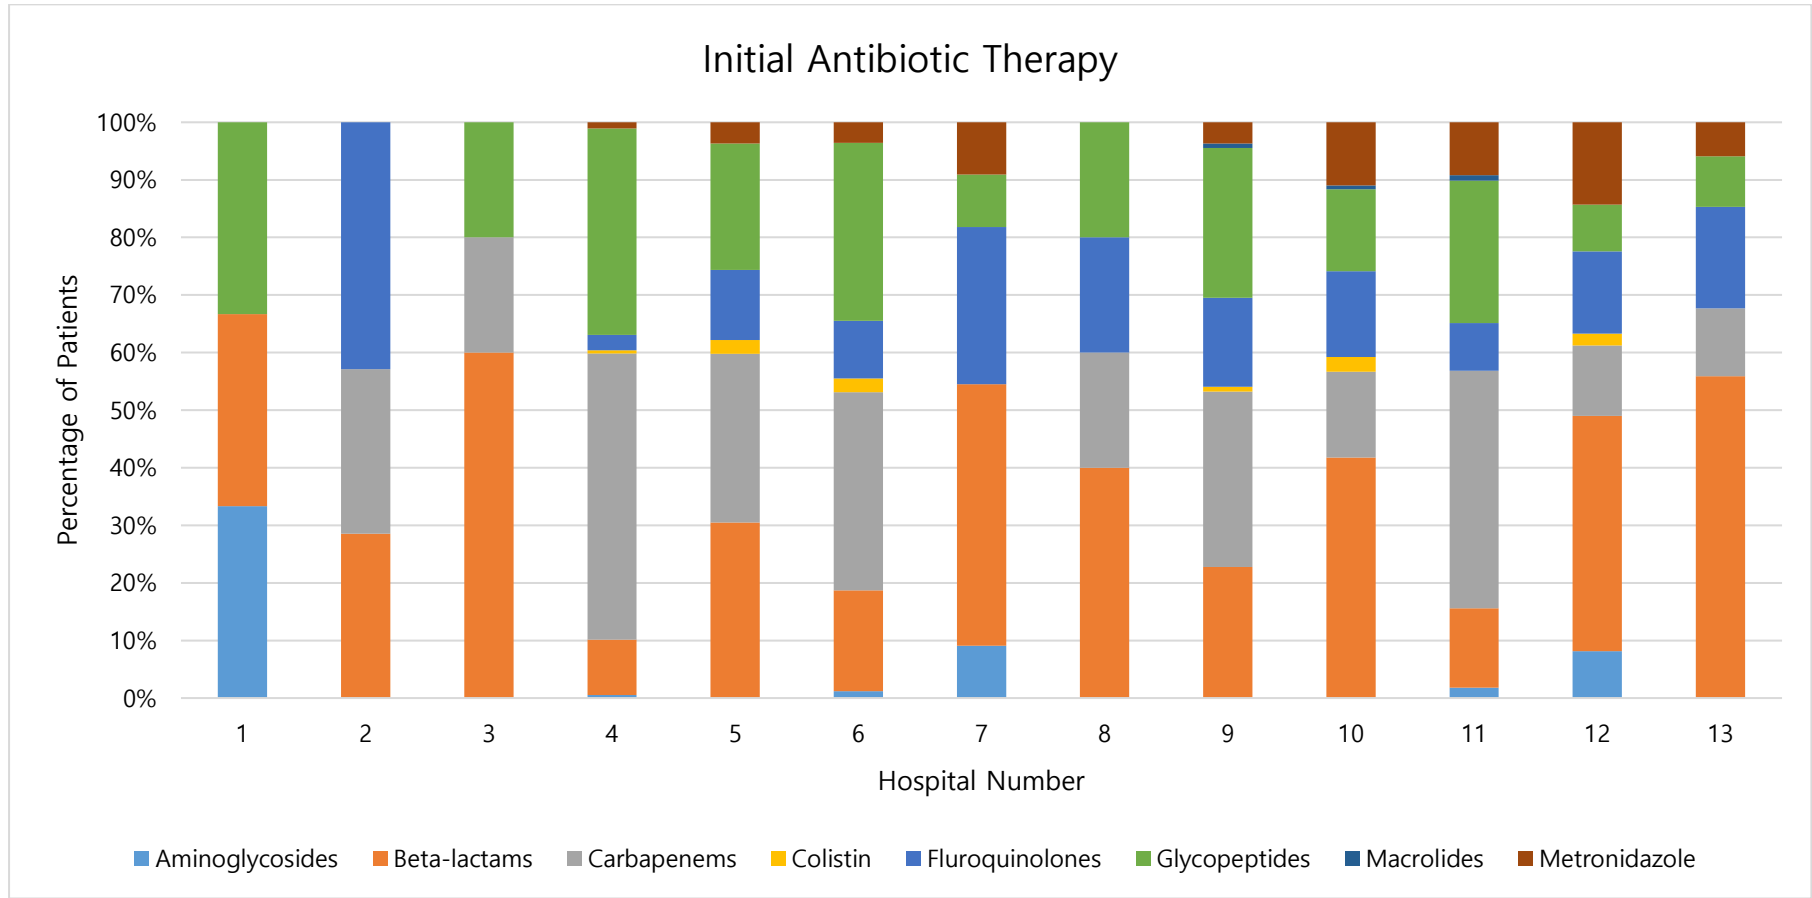

**Figure S5. Source of Infection at Each Hospital**

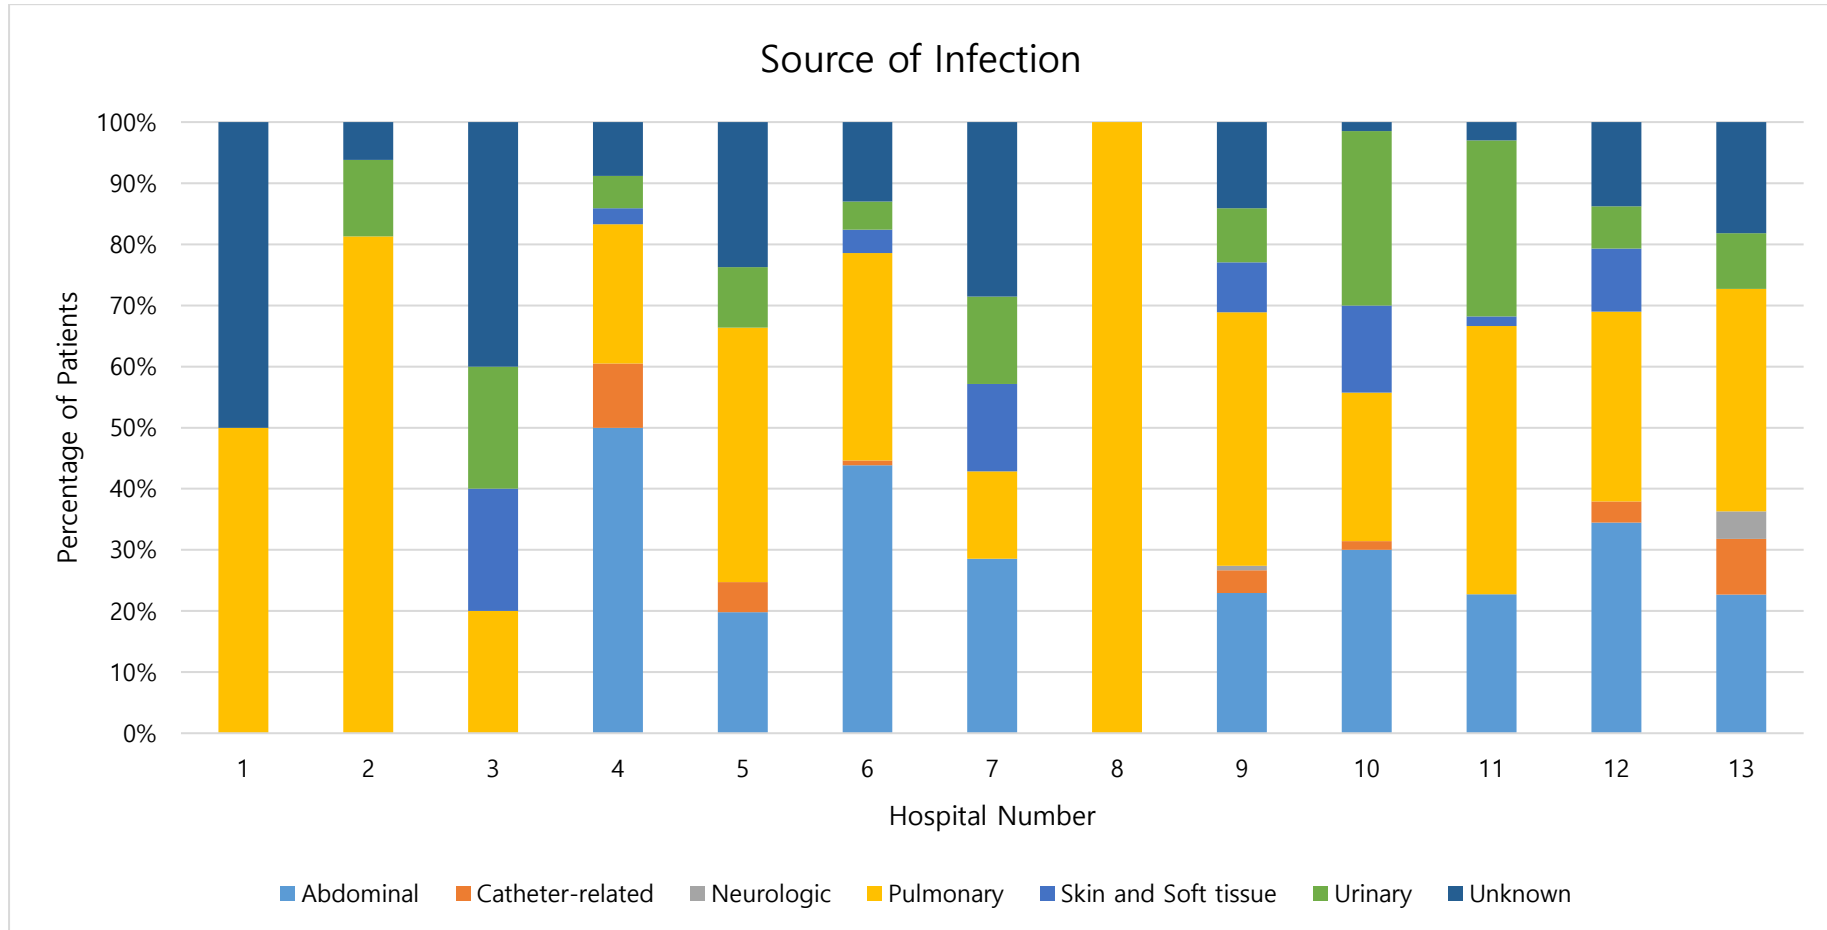

**Table S1. Activation Criteria of Rapid Response System at Participating Hospitals**

| Center                                     | Activation criteria                                                                                                                                                                                                                                                                                                                                                                                                                                                                                                                                                                                                                                                                                                                                                                                                                          |
|--------------------------------------------|----------------------------------------------------------------------------------------------------------------------------------------------------------------------------------------------------------------------------------------------------------------------------------------------------------------------------------------------------------------------------------------------------------------------------------------------------------------------------------------------------------------------------------------------------------------------------------------------------------------------------------------------------------------------------------------------------------------------------------------------------------------------------------------------------------------------------------------------|
| Korea University Anam Hospital             | A. Screening criteria<br>- MEWS $\geq 2$                                                                                                                                                                                                                                                                                                                                                                                                                                                                                                                                                                                                                                                                                                                                                                                                     |
| Seoul National University Bundang Hospital | - Systolic blood pressure: $<90$ mmHg<br>- Heart rate: $<50, >140$ /min<br>- Respiratory rate: $<10, >30$ /min<br>- Body temperature: $<36^{\circ}\text{C}, >39^{\circ}\text{C}$<br>- SpO <sub>2</sub> : $<90\%$<br>- ABG: pH $<7.25$ , PaCO <sub>2</sub> $>50$ mmHg, PaO <sub>2</sub> $<55$ mmHg<br>- Lactate $>4$ mmol/L<br>- Total CO <sub>2</sub> $<15$ mmol/L                                                                                                                                                                                                                                                                                                                                                                                                                                                                           |
| Samsung Medical Center                     | A. Calling criteria<br>- Airway: compromised, stridor<br>- Respiratory: respiratory rate $\geq 30$ , SpO <sub>2</sub> $<85\%$ for 5 min, pH $<7.3$ and PaCO <sub>2</sub> $>50$ mmHg, use of accessory respiratory muscles<br>- Cardiovascular: systolic blood pressure $<85$ mmHg, heart rate $>130$ , acute chest pain, symptomatic arrhythmia<br>- Neurologic: altered mental status of sudden onset, unexplained agitation, seizure<br>- Others: subjective assessment of physician or nurse<br>B. Screening criteria<br>- MEWS $\geq 7$                                                                                                                                                                                                                                                                                                  |
| Seoul National University Hospital         | A. Calling criteria<br>- Respiratory: respiratory rate $\leq 8$ or $\geq 28$ , SpO <sub>2</sub> $\leq 90\%$ for 5 minutes, sudden onset dyspnea<br>- Cardiovascular: heart rate $\leq 40$ or $\geq 130$ , systolic blood pressure $\leq 80$ or $\geq 200$ , systolic blood pressure $80\text{--}90$ mmHg with symptoms, chest pain unresponsive to sublingual nitroglycerin<br>- Neurologic: sudden onset of altered consciousness, sudden paralysis, new onset seizure, prolonged agitation ( $\geq 10$ minutes) not fully explained by medical conditions<br>- Others: color change of peripheral extremities, subjective assessment of physician or nurse<br>B. Screening criteria<br>- Heart rate: $<41, >129$ /min<br>- Respiratory rate: $<9, >27$ /min<br>- Systolic blood pressure: $<81, >199$ mmHg<br>- SpO <sub>2</sub> : $<90\%$ |
| Asan Medical Center                        | A. Calling criteria<br>- Airway: compromised, stridor                                                                                                                                                                                                                                                                                                                                                                                                                                                                                                                                                                                                                                                                                                                                                                                        |



|                                      |                                                                                                                                                                                                                                                                                                                                                                                                                                                                                                                                                                                                                                                                                                                                                                                                                                                                                                                                                                                                                                                                                                                                        |
|--------------------------------------|----------------------------------------------------------------------------------------------------------------------------------------------------------------------------------------------------------------------------------------------------------------------------------------------------------------------------------------------------------------------------------------------------------------------------------------------------------------------------------------------------------------------------------------------------------------------------------------------------------------------------------------------------------------------------------------------------------------------------------------------------------------------------------------------------------------------------------------------------------------------------------------------------------------------------------------------------------------------------------------------------------------------------------------------------------------------------------------------------------------------------------------|
|                                      | <ul style="list-style-type: none"> <li>- Respiratory: respiratory rate &lt;6 or &gt;30/min, SpO<sub>2</sub> &lt;90% on high flow FiO<sub>2</sub> ≥40% or O<sub>2</sub> ≥6 L/min</li> <li>- Cardiovascular: heart rate &lt;40 or &gt;140/min, systolic blood pressure &lt;90 mmHg</li> <li>- Neurologic: sudden change in mental status, seizure</li> <li>- Others: subjective assessment of attending physician or nurse</li> </ul> <p>B. Screening criteria</p> <ul style="list-style-type: none"> <li>- Systolic blood pressure &lt;86 mmHg</li> <li>- Sudden change in mental status or unexplained agitation</li> <li>- Hypoxemia with oxygen requirement of &gt;9 L/min or FiO<sub>2</sub> &gt; 35%</li> <li>- Respiratory rate &gt;27 or &lt;8/min</li> <li>- Heart rate &gt;140 or &lt;40</li> <li>- Unexplained severe metabolic acidosis: pH &lt;7.3, lactate &gt;2 mmol/L, total CO<sub>2</sub> &lt;12 mmol/L</li> <li>- PaCO<sub>2</sub> &gt; 50 mmHg or PaO<sub>2</sub> ≤ 55 mmHg</li> <li>- Subjective assessment of attending physician or nurse</li> </ul>                                                              |
| Ulsan University Hospital            | <p>A. Calling criteria</p> <ul style="list-style-type: none"> <li>- Airway: compromised, stridor, wheezing</li> <li>- Respiratory: respiratory rate ≤6 or ≥30/min, SpO<sub>2</sub> &lt;90% on O<sub>2</sub> ≥6 L/min or high flow FiO<sub>2</sub> ≥40%</li> <li>- Cardiovascular: heart rate &lt; 40 or ≥140/min, systolic blood pressure &lt; 90 mmHg</li> <li>- Neurologic: sudden change in mental status, seizure</li> <li>- Others: subjective assessment of attending physician or nurse</li> </ul> <p>B. Screening criteria</p> <ul style="list-style-type: none"> <li>- Airway: compromised, stridor, wheezing</li> <li>- Breathing: respiratory rate ≤6 or ≥30/min, SpO<sub>2</sub> &lt;90% on O<sub>2</sub> ≥6 L/min or high flow FiO<sub>2</sub> ≥40%</li> <li>- Cardiovascular: heart rate &lt; 40 or ≥140/min, systolic blood pressure ≤ 85 mmHg</li> <li>- Neurologic: sudden change in mental status, seizure</li> <li>- Others: pH ≤7.33, HCO<sub>3</sub> ≤15 mmol/L, lactate ≥2 mmol/L, potassium ≥6 mmol/L, total CO<sub>2</sub> ≤15 mmol/L, glucose ≤50 mg/dL, patients recently discharged from the ICU</li> </ul> |
| Chonnam National University Hospital | <ul style="list-style-type: none"> <li>- Systolic blood pressure &lt;80 mmHg, heart rate &lt;40 or &gt;140/min, respiratory rate ≤10 or ≥ 30/min, SpO<sub>2</sub> ≤85%</li> <li>- ABG: pH &lt;7.3, pCO<sub>2</sub> &gt;50 mmHg, pO<sub>2</sub> &lt;60 mmHg</li> <li>- Sudden change in mental status</li> <li>- Symptomatic arrhythmia</li> </ul>                                                                                                                                                                                                                                                                                                                                                                                                                                                                                                                                                                                                                                                                                                                                                                                      |
| Jeonbuk National University Hospital | <p>A. Screening criteria</p> <ul style="list-style-type: none"> <li>- NEWS ≥ 5</li> </ul>                                                                                                                                                                                                                                                                                                                                                                                                                                                                                                                                                                                                                                                                                                                                                                                                                                                                                                                                                                                                                                              |

|                                              |                                                                                                                                                                                                                                                                                                                                                                                                                                                                                                                                                                                                                                                                                                                                                                                                                                                                                                                                                                                                                               |
|----------------------------------------------|-------------------------------------------------------------------------------------------------------------------------------------------------------------------------------------------------------------------------------------------------------------------------------------------------------------------------------------------------------------------------------------------------------------------------------------------------------------------------------------------------------------------------------------------------------------------------------------------------------------------------------------------------------------------------------------------------------------------------------------------------------------------------------------------------------------------------------------------------------------------------------------------------------------------------------------------------------------------------------------------------------------------------------|
| Chungnam National University Hospital        | <p>A. Calling criteria</p> <ul style="list-style-type: none"> <li>- Airway: obstruction, stridor</li> <li>- Respiratory: respiratory rate &lt;8 or &gt;30/min, pH &lt;7.3 and PaCO<sub>2</sub> &gt; 60 mmHg, SpO<sub>2</sub> &lt;90% on facial mask or high flow nasal cannula</li> <li>- Cardiovascular: heart rate &lt;40 or &gt;140/min, systolic blood pressure &lt;90 mmHg, lactate &gt;2 mmol/L</li> <li>- Neurologic: sudden change in mental status, unexplained agitation, seizure</li> <li>- Subjective assessment of attending physician or nurse</li> </ul> <p>B. Screening criteria</p> <ul style="list-style-type: none"> <li>- based on NEWS</li> </ul>                                                                                                                                                                                                                                                                                                                                                        |
| Chungnam National University Sejong Hospital | <p>A. Calling criteria</p> <ul style="list-style-type: none"> <li>- Airway: obstruction, stridor</li> <li>- Respiratory: respiratory rate &lt;8 or &gt;30/min, pH &lt;7.3 and PaCO<sub>2</sub> &gt; 60 mmHg, SpO<sub>2</sub> &lt;90% on facial mask or high flow nasal cannula</li> <li>- Cardiovascular: heart rate &lt;40 or &gt;140/min, systolic blood pressure &lt;90 mmHg, lactate &gt;2 mmol/L</li> <li>- Neurologic: sudden change in mental status, unexplained agitation, seizure</li> <li>- Subjective assessment of attending physician or nurse</li> </ul> <p>B. Screening criteria</p> <ul style="list-style-type: none"> <li>- based on NEWS</li> </ul>                                                                                                                                                                                                                                                                                                                                                        |
| Hanyang University Guri Hospital             | <p>A. Calling criteria</p> <ul style="list-style-type: none"> <li>- Airway: airway obstruction sign, stridor</li> <li>- Respiratory: respiratory rate &lt;8 or &gt;30/min, pH &lt;7.3 and PaCO<sub>2</sub> &gt;60 mmHg, SpO<sub>2</sub> &lt;90% on facial mask or high flow nasal cannula</li> <li>- Cardiovascular: heart rate &lt;40 or &gt;140/min, systolic blood pressure &lt;90 mmHg, lactate &gt;2 mmol/L</li> <li>- Neurologic: sudden change in mental status, unexplained agitation, seizure</li> <li>- Subjective assessment of attending physician or nurse</li> </ul> <p>B. Screening criteria</p> <ul style="list-style-type: none"> <li>- MEWS ≥4</li> <li>- Systolic blood pressure ≤80 or ≥200 mmHg, heart rate ≤40 or ≥130/min, respiratory rate &lt;9 or ≥30/min, SpO<sub>2</sub> ≤90%</li> <li>- ABG: pH ≤7.3, pCO<sub>2</sub> ≥50 mmHg, pO<sub>2</sub> ≤60 mmHg, HCO<sub>3</sub> ≤14 mmEq/L, lactate ≥4.0 mmol/L</li> <li>- Chemistry: potassium ≥6.0 mmol/L, total CO<sub>2</sub> ≤14 mmol/L</li> </ul> |
| Daegu Catholic University Hospital           | <p>A. Calling criteria</p> <ul style="list-style-type: none"> <li>- Respiratory: respiratory rate &lt;8 or ≥30/min, pH &lt;7.3 and PaCO<sub>2</sub> &gt;60 mmHg, SpO<sub>2</sub> &lt;90% on facial mask</li> <li>- Cardiovascular: heart rate &lt;40 or ≥140/min, systolic blood pressure &lt;80 mmHg</li> <li>- Neurologic: sudden mental change, unexplained agitation for ≥10 minutes</li> <li>- Subjective assessment of attending physician or nurse</li> </ul> <p>B. Screening criteria</p> <ul style="list-style-type: none"> <li>- NEWS ≥ 5</li> </ul>                                                                                                                                                                                                                                                                                                                                                                                                                                                                |

---

Yeungnam University Medical Center

A. Screening criteria

- NEWS  $\geq 5$
- Respiratory rate  $<10$  or  $\geq 30$ /min
- Heart rate  $<40$  or  $\geq 140$ /min
- Systolic blood pressure  $\leq 80$  mmHg
- SpO<sub>2</sub>  $\leq 90\%$

---

ABG, Arterial blood gas analysis; FiO<sub>2</sub>, fraction of inspired oxygen; MEWS, modified early warning score; NEWS, national early warning score; PaCO<sub>2</sub>, partial pressure of carbon dioxide in arterial blood; PaO<sub>2</sub>, partial pressure of oxygen in arterial blood; pCO<sub>2</sub>, partial pressure of carbon dioxide; pO<sub>2</sub>, partial pressure of oxygen; SpO<sub>2</sub>, oxygen saturation

**Table S2. In-hospital Mortality According to the Timing of ICU admission**

| Group                                  | No. of deaths / Total no. of patients (%) | <i>P</i> -value | Unadjusted OR (95% CI) | Adjusted OR (95% CI) <sup>a</sup> |
|----------------------------------------|-------------------------------------------|-----------------|------------------------|-----------------------------------|
| <b>Unmatched cohort</b>                |                                           |                 |                        |                                   |
| Early admission                        | 181/470 (38.5)                            | 0.44            | 1.14 (0.84–1.54)       | 1.36 (0.99–1.87)                  |
| Delayed admission                      | 119/286 (41.6)                            |                 |                        |                                   |
| <b>Propensity-score-matched cohort</b> |                                           |                 |                        |                                   |
| Early admission                        | 83/239 (34.7)                             | 0.13            | 1.35 (0.93–1.96)       | 1.38 (0.94–2.03)                  |
| Delayed admission                      | 100/239 (41.8)                            |                 |                        |                                   |

OR, odds ratio; CI, confidence interval

<sup>a</sup> In the unmatched cohort, odds ratios were adjusted for age and initial sequential organ failure assessment (SOFA) scores and center variables. In the propensity score-matched cohort, the odds ratios were adjusted for age, SOFA scores, center variables and propensity scores.

**Table S3. Secondary Outcomes According to the Timing of ICU Admission**

| <b>Outcome</b>                                    | <b>Early admission<br/>(N = 470)</b> | <b>Delayed admission<br/>(N = 286)</b> | <b>P-value</b> |
|---------------------------------------------------|--------------------------------------|----------------------------------------|----------------|
| <b>Median hospital length of stay (IQR), days</b> |                                      |                                        |                |
| In-hospital survivors                             | 27 (16–46)                           | 26 (15–48)                             | 0.93           |
| In-hospital non-survivors                         | 10 (2–29)                            | 12 (4–24)                              | 0.21           |
| <b>Median ICU length of stay (IQR), days</b>      |                                      |                                        |                |
| ICU survivors                                     | 5 (3–11)                             | 4 (2–9)                                | 0.35           |
| ICU non-survivors                                 | 4 (2–14)                             | 5 (2–12)                               | 0.30           |
| <b>Discharge, n/total (%)<sup>a</sup></b>         |                                      |                                        | 0.23           |
| At home                                           | 211/289 (73.0)                       | 113/167 (67.7)                         |                |
| Transfer at another hospital                      | 78/289 (27.0)                        | 54/167 (32.3)                          |                |

ICU, intensive care unit; IQR, interquartile range

<sup>a</sup> Analysis was performed only in patients who survived until discharge

**Table S4. Sepsis Bundle Compliance According to the Timing of ICU Admission**

| Variable                                   | Unmatched cohort |                   |         | Propensity Score-Matched Cohort |                   |         |
|--------------------------------------------|------------------|-------------------|---------|---------------------------------|-------------------|---------|
|                                            | Early admission  | Delayed admission | P-value | Early admission                 | Delayed admission | P-value |
|                                            | (N = 470)        | (N = 286)         |         | (N = 239)                       | (N = 239)         |         |
| <b>1-Hour Bundle Compliance</b>            |                  |                   |         |                                 |                   |         |
| Lactate measurement                        | 273 (58.1)       | 134 (46.9)        | 0.003   | 142 (59.4)                      | 121 (50.6)        | 0.066   |
| Blood cultures                             | 285 (60.6)       | 170 (59.4)        | 0.760   | 137 (57.3)                      | 147 (61.5)        | 0.402   |
| Administration of antibiotics <sup>a</sup> | 172/368 (46.7)   | 104/248 (41.9)    | 0.248   | 85/185 (45.9)                   | 85/208 (40.9)     | 0.359   |
| Crystalloid infusion <sup>b</sup>          | 205/283 (72.4)   | 111/138 (80.4)    | 0.093   | 99/135 (73.3)                   | 99/126 (78.6)     | 0.385   |
| Vasopressor use <sup>c</sup>               | 167/279 (59.9)   | 64/134 (47.8)     | 0.026   | 78/135 (57.8)                   | 62/122 (50.8)     | 0.316   |
| <b>3-Hour Bundle Compliance</b>            |                  |                   |         |                                 |                   |         |
| Lactate measurement                        | 344 (73.2)       | 169 (59.1)        | <0.001  | 179 (74.9)                      | 153 (64.0)        | 0.013   |
| Blood cultures                             | 359 (76.4)       | 202 (70.6)        | 0.087   | 176 (73.6)                      | 175 (73.2)        | 1.000   |
| Administration of antibiotics <sup>a</sup> | 260/368 (70.7)   | 160/248 (64.5)    | 0.113   | 130/185 (70.3)                  | 135/208 (64.9)    | 0.282   |
| Crystalloid infusion <sup>b</sup>          | 208/283 (73.5)   | 112/138 (81.2)    | 0.090   | 101/135 (74.8)                  | 100/126 (79.4)    | 0.462   |
| Vasopressor use <sup>c</sup>               | 219/279 (78.5)   | 85/134 (63.4)     | 0.002   | 102/135 (75.6)                  | 78/122 (63.9)     | 0.056   |

<sup>a</sup> Initiation of antibiotic therapy on patients who were not previously on antibiotics

<sup>b</sup> Patients with either hypotension (mean blood pressure < 65 mmHg) or lactate ≥ 4 mmol/L

<sup>c</sup> Patients with hypotension despite fluid resuscitation

**Table S5. Time to ICU Admission by Rapid Response System Operating Hours**

| <b>Outcome</b>                            | <b>24-Hour RRS<br/>(N = 446)</b> | <b>Part-time RRS<sup>a</sup><br/>(N = 310)</b> | <b>P-value</b> |
|-------------------------------------------|----------------------------------|------------------------------------------------|----------------|
| <b>Time to ICU Admission (IQR), hours</b> | 3.8 (1.6–9.5)                    | 3.4 (1.1–10.4)                                 | 0.22           |
| <b>Timing of ICU Admission, n (%)</b>     |                                  |                                                |                |
| Early Admission                           | 274 (61.4%)                      | 196 (63.2%)                                    | 0.67           |
| Delayed Admission                         | 172 (38.6%)                      | 114 (36.8%)                                    |                |

RRS, rapid response system; ICU, intensive care unit; IQR, interquartile range

<sup>a</sup> RRS that operated <24 hours

**Table S6. Initial Antibiotic Therapy and Source of Infection According to the Timing of ICU Admission**

| <b>Variable</b>                        | <b>Early admission<br/>(N = 470)</b> | <b>Delayed admission<br/>(N = 286)</b> | <b>P-value</b> |
|----------------------------------------|--------------------------------------|----------------------------------------|----------------|
| <b>Initial Antibiotic Therapy</b>      |                                      |                                        |                |
| Aminoglycoside                         | 12 (2.6)                             | 3 (1)                                  | 0.19           |
| Beta-lactam                            | 201 (42.8)                           | 124 (43.4)                             | 0.88           |
| Carbapenem                             | 280 (59.6)                           | 175 (61.2)                             | 0.70           |
| Colistin                               | 12 (2.6)                             | 10 (3.5)                               | 0.51           |
| Fluroquinolone                         | 106 (22.6)                           | 59 (20.6)                              | 0.59           |
| Glycopeptide                           | 240 (51.1)                           | 126 (44.1)                             | 0.07           |
| Macrolide                              | 1 (0.2)                              | 3 (1)                                  | 0.16           |
| Metronidazole                          | 44 (9.4)                             | 25 (8.7)                               | 0.80           |
| <b>Source of Infection</b>             |                                      |                                        |                |
| Abdominal                              | 174 (37)                             | 92 (32.2)                              | 0.18           |
| Catheter-related                       | 14 (3)                               | 12 (4.2)                               | 0.41           |
| Neurologic                             | 0 (0)                                | 2 (0.7)                                | 0.14           |
| Pulmonary                              | 169 (36)                             | 104 (36.4)                             | 0.94           |
| Skin and soft tissue                   | 27 (5.7)                             | 13 (4.5)                               | 0.51           |
| Urinary                                | 50 (10.6)                            | 32 (11.2)                              | 0.81           |
| Systemic infections with unknown focus | 48 (10.2)                            | 44 (15.4)                              | 0.04           |

ICU, intensive care unit
